# Supplementary material
Source: Springer Nature journal article supplement (https://www.springermedizin.de/resource/supplementary/13002_2014_445_MOESM3_ESM.pdf/9626942)

**a)**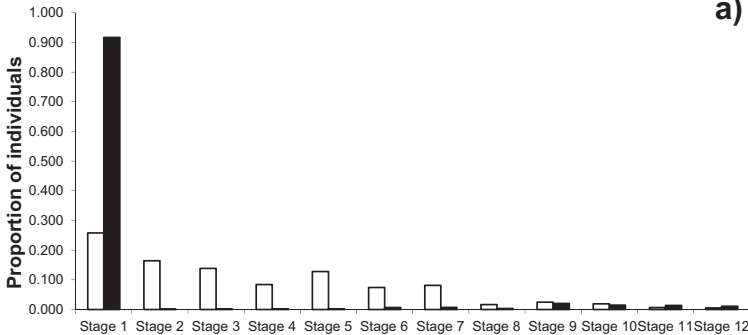**b)**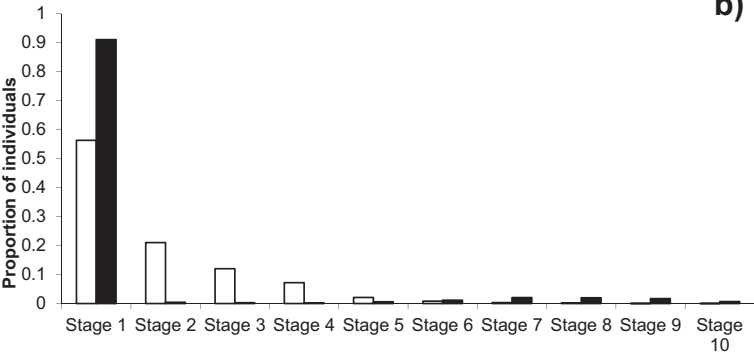

Supplement: MOESM3 [file 9626942]
